# Supplementary material for: COVID-19 and Pregnancy: A Dangerous Mix for Bone Turnover and Metabolism Biomarkers in Placenta and Colostrum
Source: MDPI journal article supplement (doi:10.3390/jcm13072124), 2024-04-06
Supplement: s1 [file s1]

## Supplementary Materials

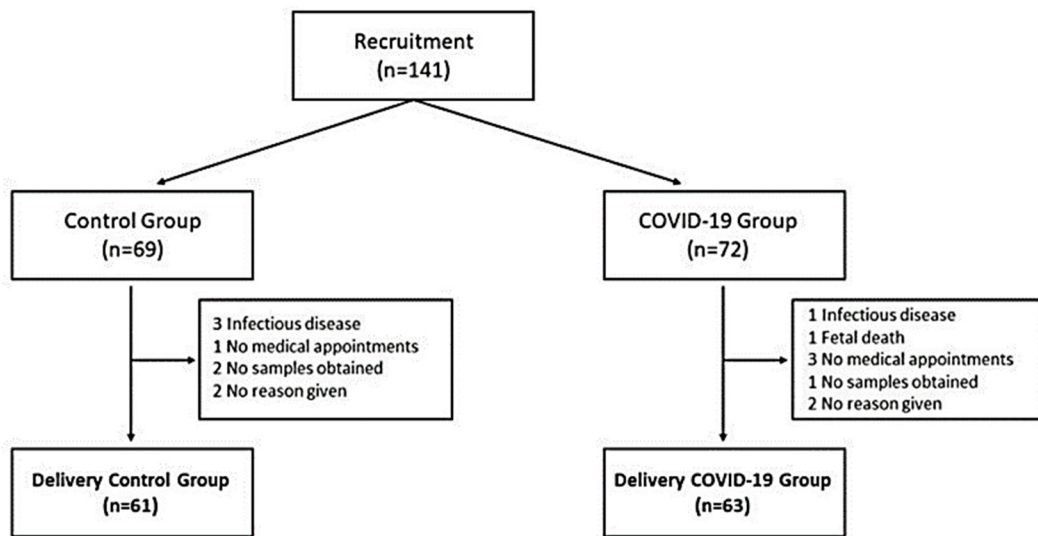

**Figure S1:** Flow chart showing the progress and abandonment of study subjects.

**Table S1.** Clinical and sociodemographic characteristics of healthy mothers and those who have suffered COVID-19.

|                                                | Control<br>group | Covid-19<br>group |
|------------------------------------------------|------------------|-------------------|
| Age (years)                                    | 31.58 ± 1.09     | 31.96 ± 0.78      |
| Weight (kg)                                    | 73.69 ± 2.55     | 74.12 ± 2.67      |
| Height (cm)                                    | 166.83 ± 1.03    | 163.97 ± 0.68     |
| BMI (kg/m <sup>2</sup> )                       | 26.31 ± 1        | 27.3 ± 0.8        |
| Parity                                         | Uni (%): 52.22   | 53.14             |
|                                                | Multi (%): 47.28 | 46.86             |
|                                                | V (%): 56.2      | 58.7              |
|                                                | A (%): 21.8      | 19.9              |
| Delivery method                                | C (%): 21.8      | 23.8              |
| Hemoglobin<br>2 <sup>nd</sup> T (g/L)          | 11.88 ± 0.23     | 11.53 ± 0.13      |
| Hemoglobin<br>3 <sup>rd</sup> T (g/L)          | 11.96 ± 0.23     | 11.72 ± 0.17      |
| Hematocrit<br>2 <sup>nd</sup> T (%)            | 35.32 ± 0.61     | 34.11 ± 0.37      |
| Hematocrit<br>3 <sup>rd</sup> T (%)            | 35.70 ± 0.63     | 34.82 ± 0.47      |
| Serum Iron<br>3 <sup>rd</sup> T (µg/dL)        | 97.05 ± 14.35    | 60.14 ± 9.87**    |
| Total Cholesterol<br>3 <sup>rd</sup> T (mg/dL) | 205.29 ± 11.23   | 208.13 ± 14.05    |
| AST<br>3 <sup>rd</sup> T (IU/L)                | 29.01 ± 12.10    | 21.01 ± 3.21      |
| ALT<br>3 <sup>rd</sup> T (IU/L)                | 22.15 ± 10.24    | 18.17 ± 4.11      |

BMI: Body mass Index; T: Term; V: Vaginal; A: Assisted Vaginal Delivery; C: Cesarean; AST: aspartate aminotransferase; ALT alanine aminotransferase. \*\*Significantly different from the control group (P < 0.01, Student's t test).
